# Supplementary material for: A Digital CRISPR-based Method for the Rapid Detection and Absolute Quantification of Viral Nucleic Acids
Source: bioRxiv or medRxiv preprint supplement (doi:10.1101/2020.11.03.20223602), 2020-11-05
Supplement: Supplementary file [file media-1.pdf]

1 Supplementary information

2 A Digital CRISPR-based Method for the Rapid Detection  
3 and Absolute Quantification of Viral Nucleic Acids

4 Xiaolin Wu<sup>1</sup>, Cheryl Chan<sup>1</sup>, Yie Hou Lee<sup>1</sup>, Stacy L. Springs<sup>1,2</sup>, Timothy K.  
5 Lu<sup>1,3,4,5,6,7,8\*</sup>, Hanry Yu<sup>1,9,10,11\*</sup>

6 <sup>1</sup>Singapore-MIT Alliance for Research and Technology, Critical Analytics for  
7 Manufacturing of Personalized Medicine Interdisciplinary Research Group,  
8 Singapore 138602, Singapore

9 <sup>2</sup>Center for Biomedical Innovation, Massachusetts Institute of Technology,  
10 Cambridge, MA, USA.

11 <sup>3</sup>Synthetic Biology Center, Massachusetts Institute of Technology (MIT),  
12 Cambridge, MA 02139, USA

13 <sup>4</sup>Synthetic Biology Group, Research Laboratory of Electronics, Massachusetts  
14 Institute of Technology (MIT), Cambridge, MA 02139, USA

15 <sup>5</sup>Broad Institute of MIT and Harvard, Cambridge, MA 02142, USA

16 <sup>6</sup>Department of Electrical Engineering and Computer Science, Massachusetts  
17 Institute of Technology (MIT), Cambridge, MA 02142, USA

18 <sup>7</sup>Harvard-MIT Division of Health Sciences and Technology, Cambridge, MA  
19 02139, USA

20 <sup>8</sup>Department of Biological Engineering, Massachusetts Institute of Technology  
21 (MIT), Cambridge, MA 02142, USA

22 <sup>9</sup>Institute of Bioengineering and Nanotechnology, A\*STAR, The Nanos, #04-  
23 01, 31 Biopolis Way, Singapore 138669, Singapore

24 <sup>10</sup>Mechanobiology Institute, National University of Singapore, T-Lab, #05-01,  
25 5A Engineering Drive 1, Singapore 117411, Singapore

26 <sup>11</sup>Department of Physiology, The Institute for Digital Medicine (WisDM), Yong  
27 Loo Lin School of Medicine, MD9-04-11, 2 Medical Drive, Singapore 117593,  
28 Singapore

29 \* Correspondence should be addressed to Timothy K. Lu (timlu@mit.edu) and  
30 Hanry Yu (phsyuh@nus.edu.sg).

31 **Items included in supplementary information :**

32 **Supplementary Figures 1 to 6**

33 **Supplementary Tables 1 to 3**

34 **Supplementary References**

**Supplementary Table 1. Primers and probes used in this study.**

| Name                   | Sequence                                                          | Application                                             |
|------------------------|-------------------------------------------------------------------|---------------------------------------------------------|
| ssDNA-FQ reporter      | /56-FAM/TTATT/3IABkFQ/                                            | Cas12a FQ reporter                                      |
| N-RNA-F                | gaaatTAATACGACTCACTATAgggATGTCTGATAATGGACCCCAAAAT                 | Amplify N gene on plasmid                               |
| N-RNA-R                | gaaatTTAGGCCTGAGTTGAGTCAGCACT                                     | Amplify N gene on plasmid                               |
| CHNCDC-geneN-F         | GGGGAACCTTCTCCTGCTAGAAT                                           | dPCR Primer for N gene                                  |
| CHNCDC-geneN-R         | CAGACATTTTGCTCTCAAGCTG                                            | dPCR Primer for N gene                                  |
| CHNCDC-geneN-P         | /56-FAM/TT GCT GCT G/ZEN/C TTG ACA GAT T/3IABkFQ/                 | dPCR Probe for N gene                                   |
| T7-3G IVT primer       | GAAATTAATACGACTCACTATAGGG                                         | universal primer used for crRNA synthesis               |
| N-N-RPA-F              | AACTCCAGGCAGCAGTAGGGGAACTT                                        | CRISPR Primer for N gene                                |
| N-N-RPA-R              | CCTTTACCAGACATTTTGCTCTCAAG                                        | CRISPR Primer for N gene                                |
| N-N-crRNA-IVT          | AATCTGTCAAGCAGCAGATCTACACTTAGTAGAAATTACCCTATAGTGAGTCGTATTAATTTTC  | crRNA template for N gene, pair with T7-3G IVT primer   |
| N-AIOD-F <sup>1</sup>  | AGGCAGCAGTAGGGGAACTTCTCCTGCTAG AAT                                | RADICA Primer for N gene                                |
| N-AIOD-R <sup>1</sup>  | TTGGCCTTTACCAGACATTTTGCTCTCAAGC TG                                | RADICA Primer for N gene                                |
| N-AIOD-crRNA-IVT-F     | ggctggcaatggcggatgATCTACACTTAGTAGAAATTACCCTATAGTGAGTCGTATTAATTTTC | crRNA template for N gene, pair with T7-3G IVT primer   |
| T7-Cas12scaffold-F     | gaaatTAATACGACTCACTATAGGTAATTTCTACTAAGTGTAGAT                     | universal primer used for crRNA synthesis               |
| N-RPA-RR               | AGCAGATTTCTTAGTGACAGTTTGGCCTTGT TG                                | CRISPR Primer for N gene                                |
| N2-RPA-RR              | AGCAAAATGACTTGATCTTTGAAATTTGGAT CT                                | CRISPR Primer for N gene                                |
| N-JQ217-F <sup>2</sup> | CAACTTCCTCAAGGAACAACATTGCCAAAA                                    | CRISPR Primer for N gene                                |
| N-JQ235-R <sup>2</sup> | TGGAGTTGAATTTCTTGAAGTGTGCGACT                                     | CRISPR Primer for N gene                                |
| NF-CoV-RR              | GAGAAGTTCCCCTACTGCTG                                              | CRISPR Primer for N gene                                |
| NF-crRNA-1F            | CTTCTACGCAGAAGGGAGCAatctacacttagtaga aatta                        | crRNA template for N gene, pair with T7-Cas12scaffold-F |
| EBV-EBNA1-F2           | GCCGGTGTGTTTCGTATATGGAGGTAGTAAG AC                                | RADICA Primer for EBV                                   |
| EBV-EBNA1-R2           | ATTCCAAAGGGGAGACGACTCAATGGTGTA A                                  | RADICA Primer for EBV                                   |
| EBNA-2R1-crRNAR        | ACGACATTGTGGAAYAGCAAGGatctacacttagt agaaatta                      | crRNA template for EBV, pair with T7-Cas12scaffold-F    |

36 **Supplementary Table 2. Quantification of linearized plasmid target by**  
 37 **RADICA**

| Number of replications | dPCR measured concentration (copies/ $\mu$ L) | Mean of RADICA measured concentration (copies/ $\mu$ L) | Standard deviation (copies/ $\mu$ L) | Relative standard deviation or coefficient of variation (CV) |
|------------------------|-----------------------------------------------|---------------------------------------------------------|--------------------------------------|--------------------------------------------------------------|
| 10                     | Non template control                          | 0.17                                                    | 0.15                                 | -                                                            |
| 14                     | 0.70                                          | 0.60                                                    | 0.29                                 | 49.41%                                                       |
| 14                     | 2.80                                          | 2.20                                                    | 0.25                                 | 11.25%                                                       |
| 13                     | 11.19                                         | 9.06                                                    | 1.23                                 | 13.53%                                                       |
| 14                     | 44.76                                         | 35.53                                                   | 5.30                                 | 14.91%                                                       |
| 10                     | 179.06                                        | 146.90                                                  | 18.02                                | 12.27%                                                       |
| 10                     | 716.24                                        | 626.58                                                  | 73.96                                | 11.80%                                                       |
| 10                     | 2387.46                                       | 2027.27                                                 | 152.76                               | 7.54%                                                        |

38

39

40 **Supplementary Table 3. Comparison of RADICA with other viral detection**  
 41 **methods.**

|                                                        | RT-PCR                | CRISPR-based isothermal method | RT-digital PCR        | Digital RPA/digital LAMP | RADICA                                                                     |
|--------------------------------------------------------|-----------------------|--------------------------------|-----------------------|--------------------------|----------------------------------------------------------------------------|
| <b>Detecting Substance</b>                             | RNA, DNA, cDNA        | RNA, DNA, cDNA                 | RNA, DNA, cDNA        | DNA, cDNA                | DNA, cDNA                                                                  |
| <b>LoD (for SARS-CoV-2)</b>                            | 5 copies per reaction | 20 copies per reaction         | 2 copies per reaction | NA                       | 13.5 copies per reaction<br>(0.897 copies/ $\mu$ L in 15 $\mu$ L reaction) |
| <b>Result Time</b>                                     | 2 hours               | <b>1 hour</b>                  | 4 hours               | <b>1 hour</b>            | <b>1 hour</b>                                                              |
| <b>Thermal cycling Requirements</b>                    | Yes                   | <b>No</b>                      | Yes                   | <b>No</b>                | <b>No</b>                                                                  |
| <b>All devices and reagents commercially available</b> | <b>Yes</b>            | <b>Yes</b>                     | <b>Yes</b>            | No                       | <b>Yes</b>                                                                 |
| <b>Ease of primer and crRNA design</b>                 | <b>Yes</b>            | Moderate                       | <b>Yes</b>            | Moderate                 | <b>Yes</b>                                                                 |
| <b>Specificity</b>                                     | <b>Good</b>           | <b>Good</b>                    | <b>Good</b>           | Normal                   | <b>Good</b>                                                                |
| <b>Absolute quantification</b>                         | No                    | No                             | <b>Yes</b>            | <b>Yes</b>               | <b>Yes</b>                                                                 |

42 **Supplementary References**

- 43 1. Ding, X. et al. Ultrasensitive and visual detection of SARS-CoV-2 using  
 44 all-in-one dual CRISPR-Cas12a assay. *Nature communications* **11**,  
 45 4711 (2020).  
 46 2. Qian, J. et al. An enhanced isothermal amplification assay for viral  
 47 detection. *bioRxiv*, 2020.2005.2028.118059 (2020).

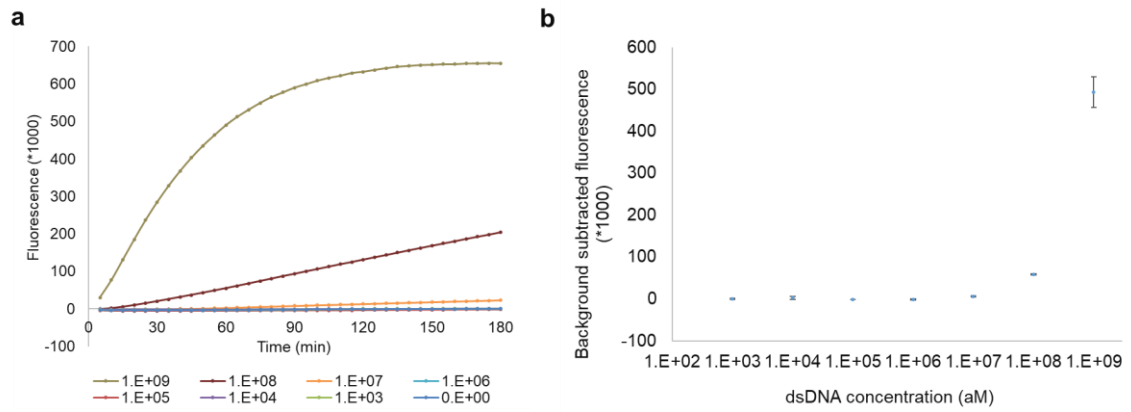

48

49 **Supplementary Figure 1. Cas12a detection sensitivity of dsDNA dilution**  
 50 **series without pre-amplification. a**, Kinetics of Cas12a-crRNA on dsDNA  
 51 dilution series. **b**, Detection sensitivity analysis of dsDNA dilution series with  
 52 Cas12a-crRNA in 1h. 50nM Cas12-crRNA and 250 nM FQ-ssDNA probe were  
 53 incubated with dsDNA dilution series at 37°C and fluorescence was monitored  
 54 every 5 min.

55

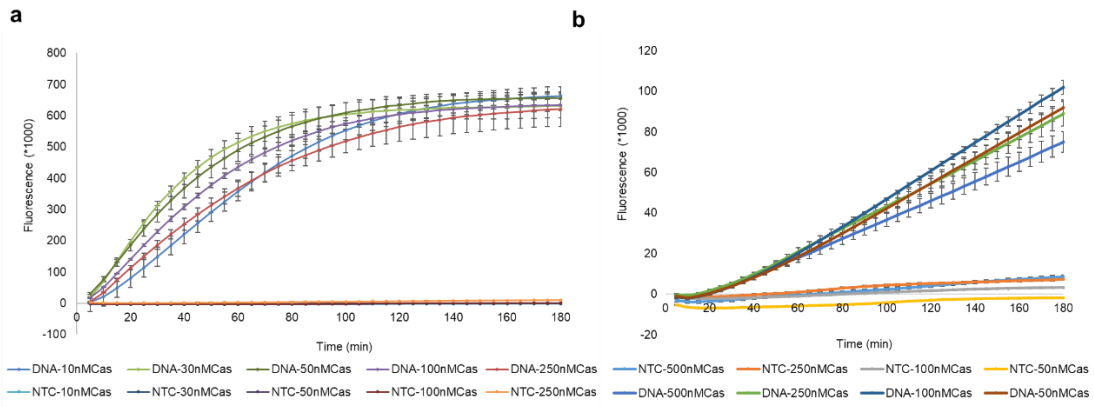

56

57 **Supplementary Figure 2. Detection of dsDNA without preamplification at**  
 58 **different Cas12a/crRNA concentrations. a, 1 nM dsDNA incubated with 10-**  
 59 **250 nM Cas12a-crRNA and 250 nM FQ ssDNA probe. b, 0.1 nM dsDNA**  
 60 **incubated with 50-500 nM Cas12a-crRNA and 500 nM FQ ssDNA probe.**

61

62

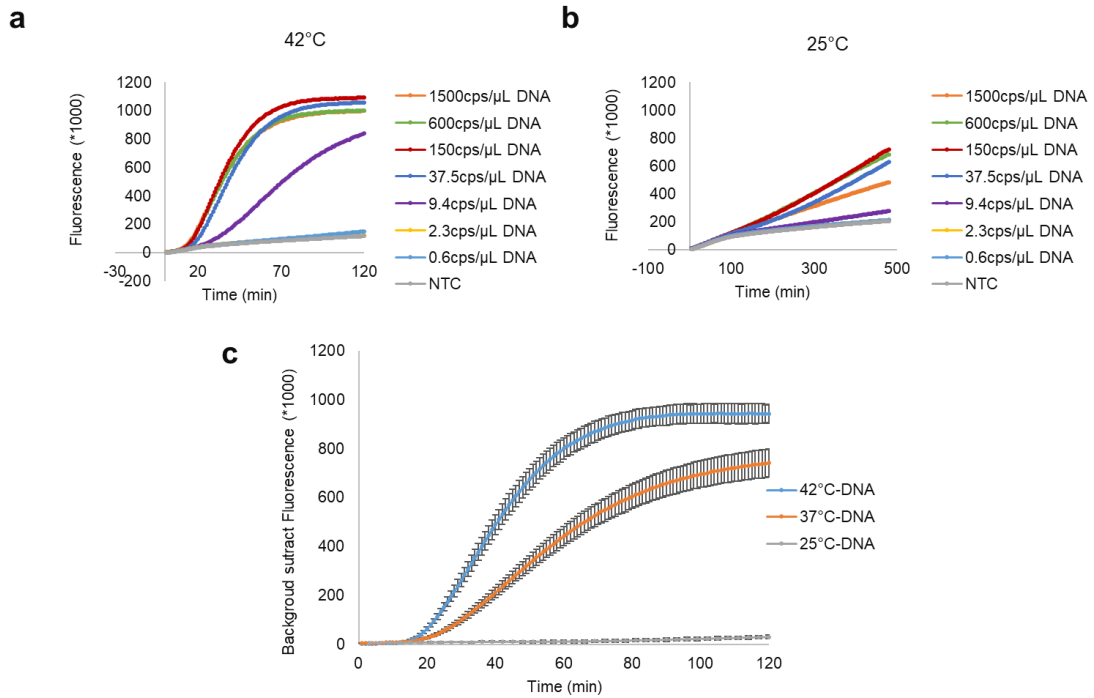

63

64 **Supplementary Figure 3. RPA+Cas12a bulk reaction at different**  
 65 **temperatures. a, b, RPA+Cas12a one-pot reaction on serial dilutions of DNA**  
 66 **at 42°C (a) or 25°C (b). c, RPA+Cas12a one-pot reaction on 37.5 copies/μL**  
 67 **plasmid DNA at different temperatures (25°C, 37°C, and 42°C).**

68

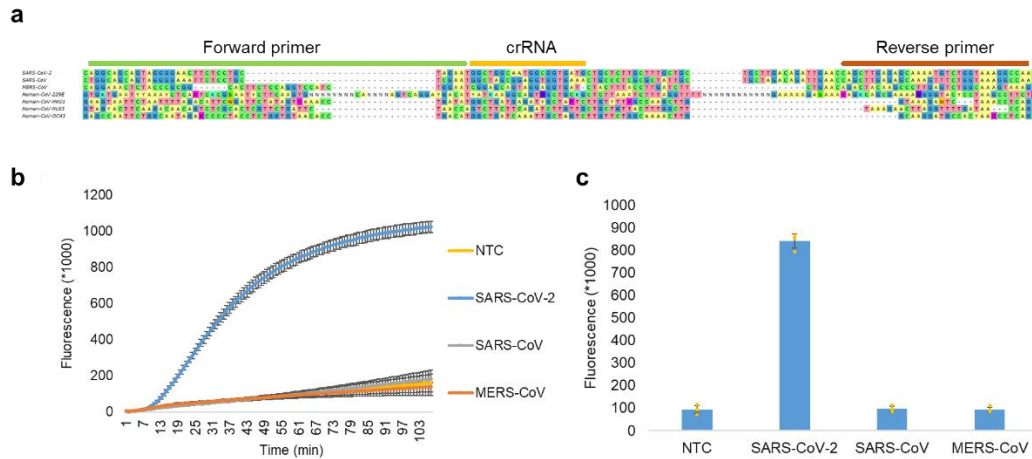

69

70 **Supplementary Figure 4. Specificity analysis for SARS-CoV-2.** **a**,  
 71 Sequence alignment of the SARS-CoV-2 target region (N gene) and the  
 72 corresponding regions on other human coronaviruses. **b**, Time course reaction  
 73 of bulk RPA-Cas12a assay on SARS-CoV-2, SARS-CoV, and MERS-CoV N  
 74 gene DNA target. The same concentration (25000 copies/ $\mu$ L) of the N gene  
 75 target from different coronaviruses was tested by the bulk RPA-Cas12a assay.  
 76 **c**, Specificity of the bulk RPA-Cas12a assay for detection of the SARS-CoV-2  
 77 N gene.

78



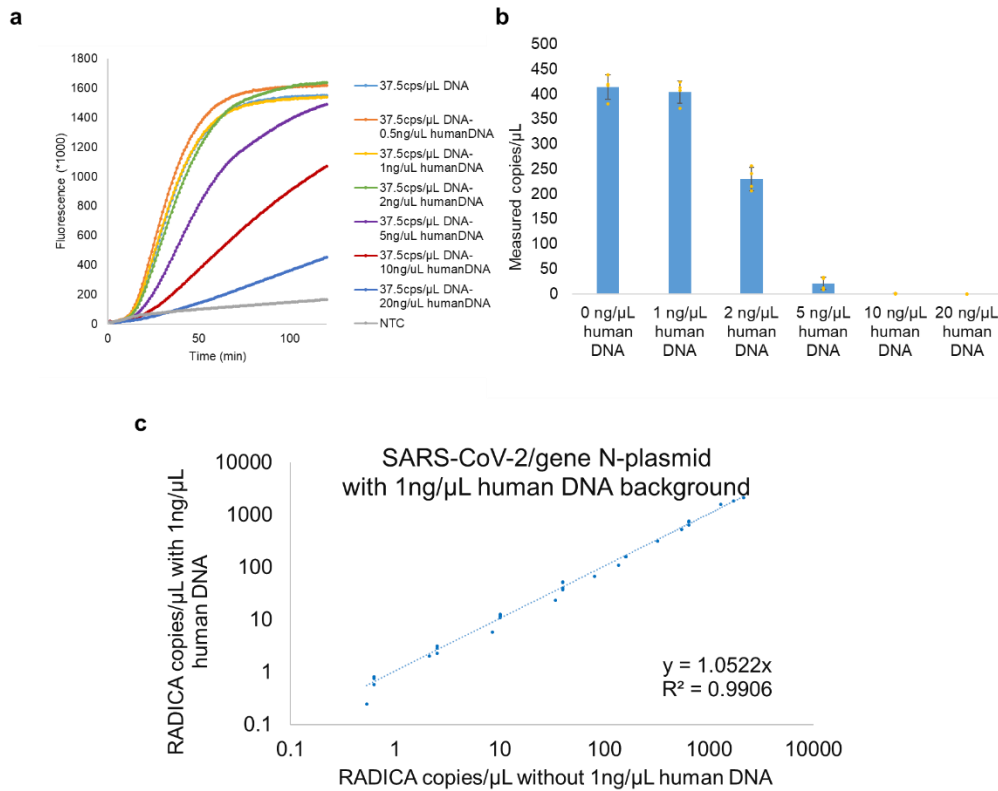

79

80 **Supplementary Figure 5. RPA inhibition by human background DNA. a,**  
 81 Results of bulk RPA-Cas12a reaction to detect target DNA (i.e., the N gene  
 82 from SARS-CoV-2) in the presence of various amounts of human background  
 83 DNA. **b,** Results of RADICA reaction with target DNA and various amounts of  
 84 human background DNA. Each point represents one sample. **c,** Comparison of  
 85 the RADICA reaction with or without 1ng/μL human background DNA.

86

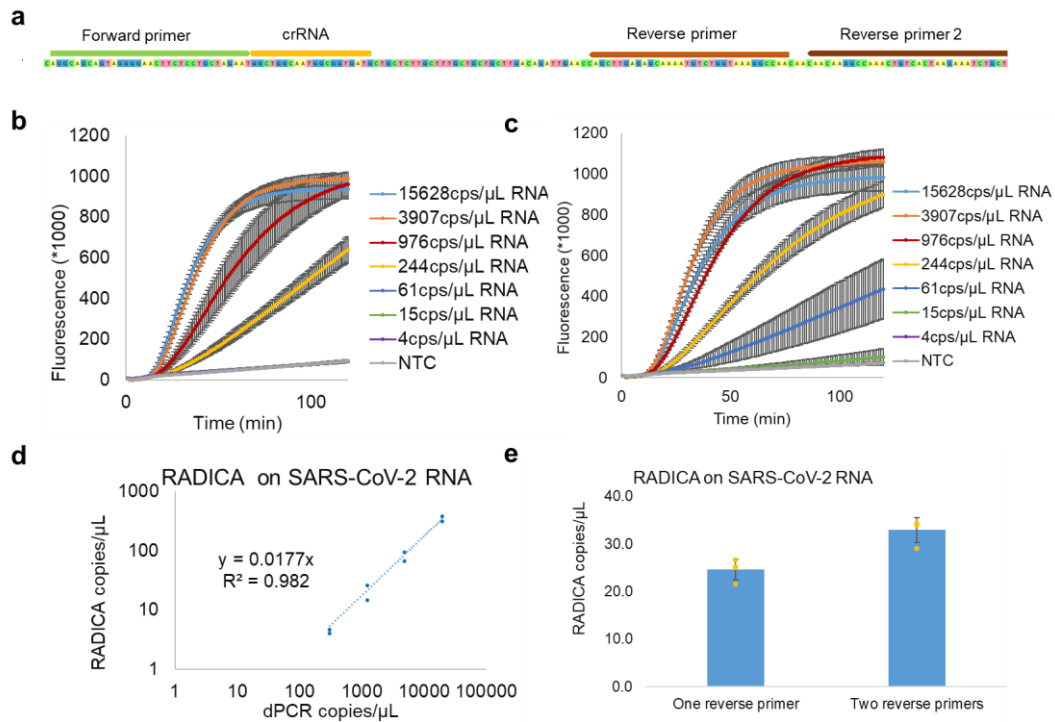

87

88 **Supplementary Figure 6. Digital isothermal CRISPR reaction on RNA**  
 89 **samples. a**, Design of two reverse primers to increase the sensitivity. **b, c**, Bulk  
 90 RPA-Cas12a reaction on RNA at different concentrations with normal one  
 91 reverse primer design (**b**) or two reverse primers design (**c**). **d**, Comparison of  
 92 the absolute quantification result of RADICA and digital PCR on SARS-CoV-2  
 93 RNA. **e**, Comparison of RADICA's performance on normal one reverse primer  
 94 design and two reverse primers design.

95
